# Supplementary material
Source: MDPI journal article supplement (https://www.mdpi.com/2571-9408/5/4/148)
Supplement: s1 [file s1]

## **Supplementary Materials**

### **Studying Saraha: Technical and multi-analytical investigation of the painting materials and techniques in an 18th century Tibetan thangka**

Joanne Dyer<sup>1†</sup>, Alice Derham<sup>2</sup>, Daniel O'Flynn<sup>1</sup>, Diego Tamburini<sup>1</sup>, Teresa Heady<sup>3</sup> and Imma Ramos<sup>4</sup>

1 Department of Scientific Research, British Museum, Great Russell Street, London WC1B 3DG, UK.

2 Department of Collection Care, Pictorial Art Conservation, British Museum, Great Russell Street, London WC1B 3DG, UK.

3 Department of Collection Care, Organic Materials Conservation, British Museum, Great Russell Street, London WC1B 3DG, UK.

4 Department of Asia, British Museum, Great Russell Street, London WC1B 3DG, UK.

† Corresponding author; [jdyer@britishmuseum.org](mailto:jdyer@britishmuseum.org)

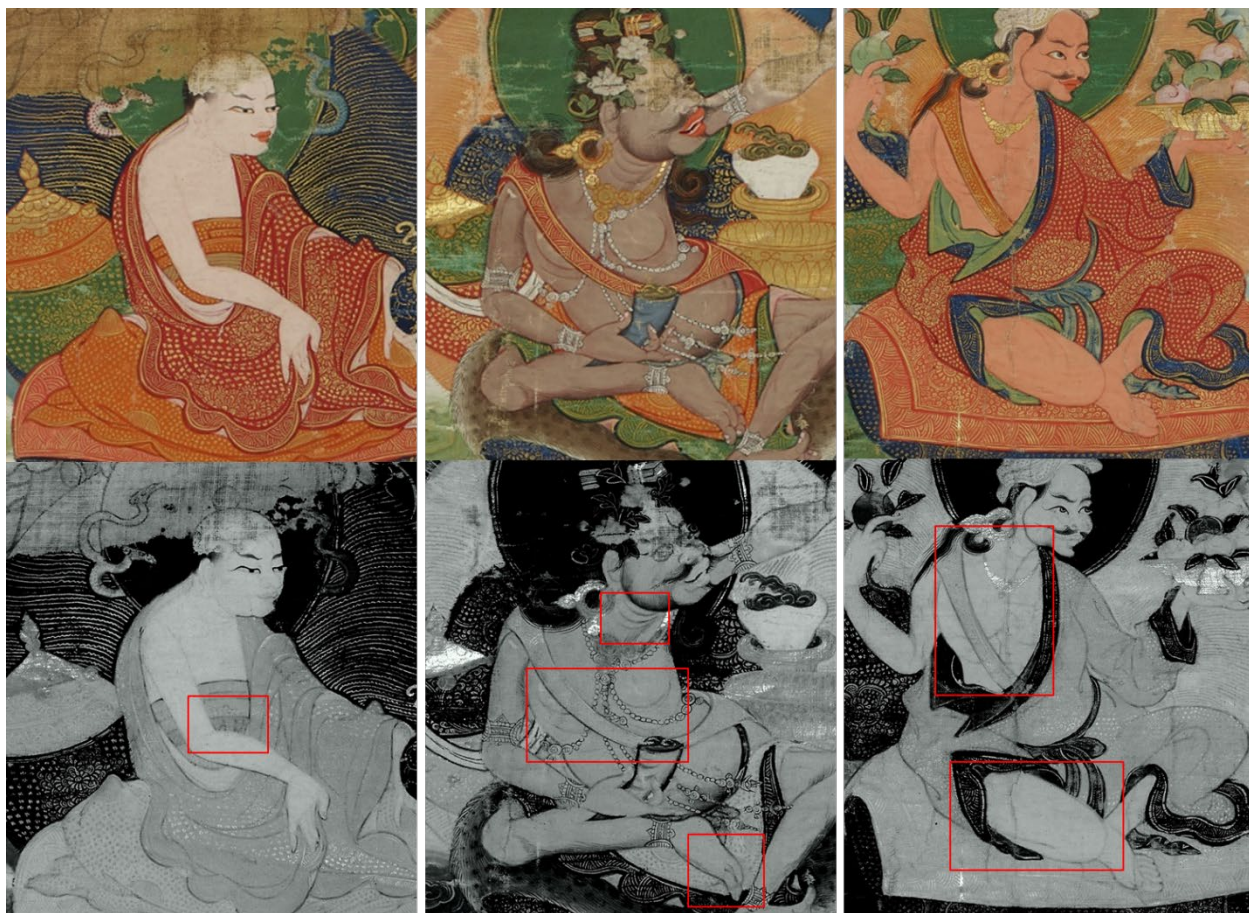

Figure S1. Details from VIS (top) and IRR (bottom; enhanced contrast) images. The areas marked in red show examples of revisions or additions to the underdrawing in the final composition. These are; Left - changes to the pattern on the belt of Nagarjuna (top left); Middle - changes to the lines demarking the chest and neck, and toes added to the proper right foot of Virupa (top right); Right - changes to the lines demarking the chest and neck, and lines added to the proper right leg of Padmavajra (bottom centre) © Trustees of the British Museum.

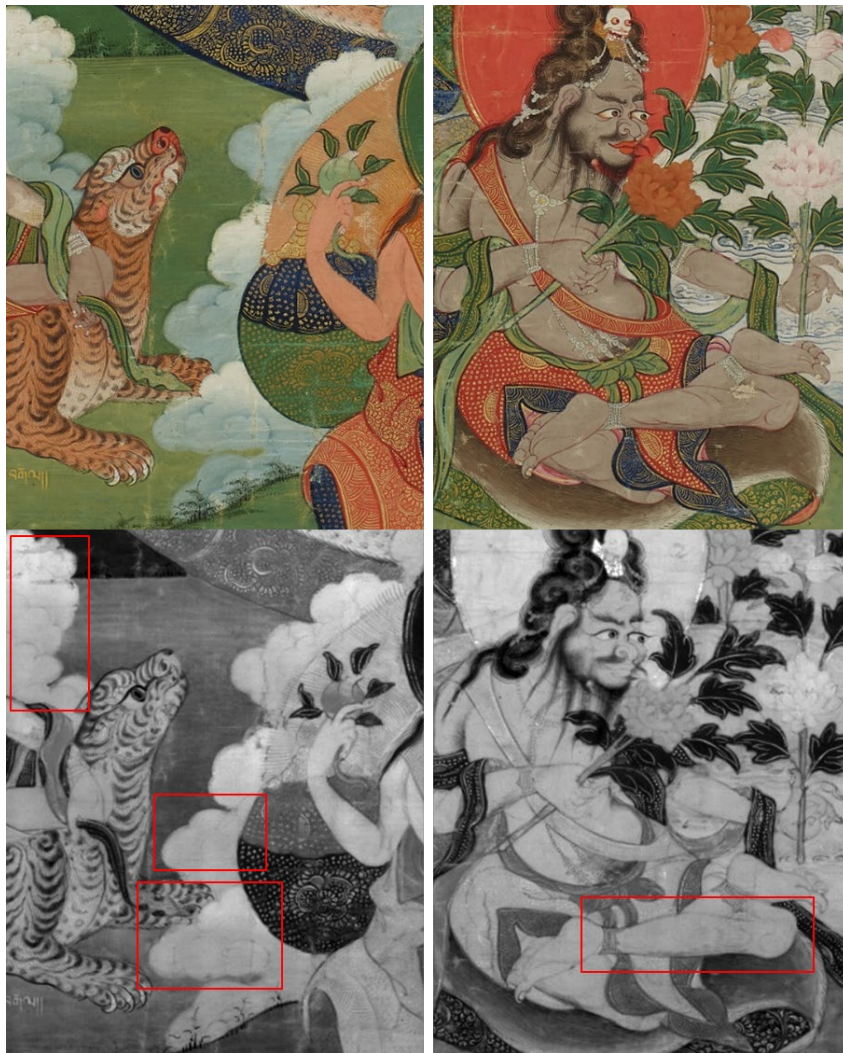

Figure S2. Details from SWIR image showing revisions of the underdrawing in the final composition. These are; Left - visible underdrawings under the clouds behind Dombi Heruka (bottom left) and Padmavajra (bottom centre), and slight revisions to the shape and modelling of the clouds by tiger's claws, and Right - changes to the contouring of the proper left leg of Saroruhavajra (bottom right). © Trustees of the British Museum.



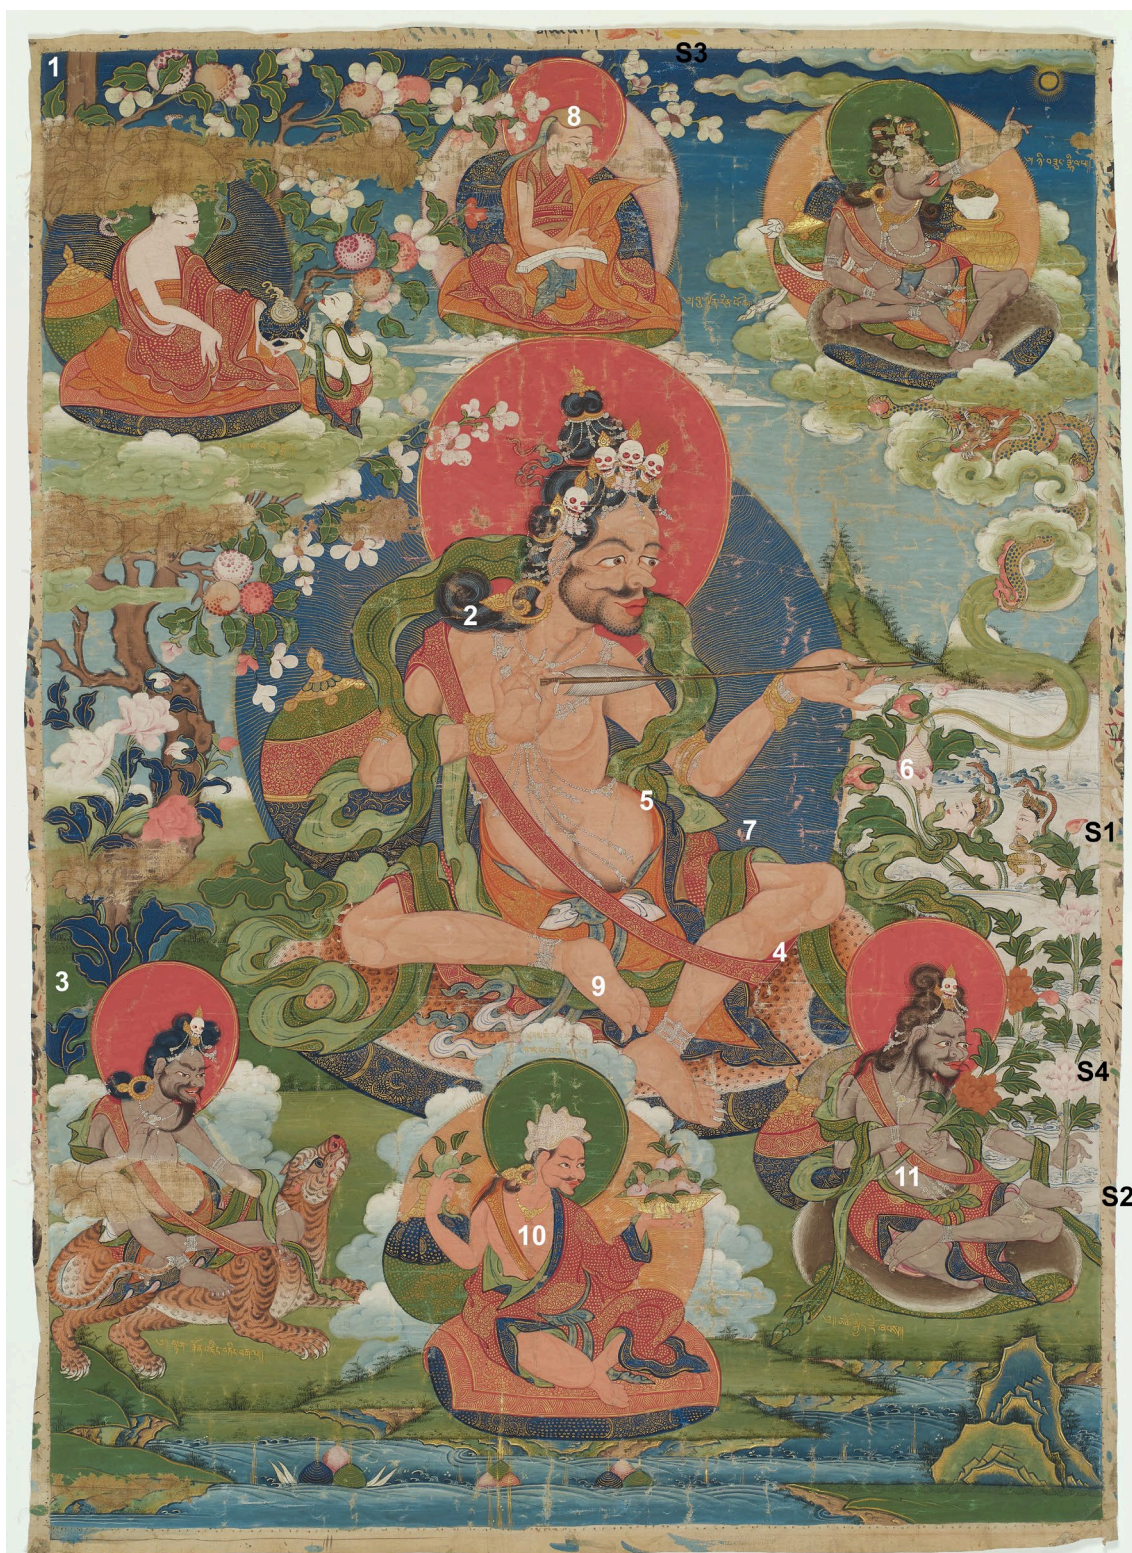

Figure S3. Location of selected FORS measurements (white) and samples taken for FTIR/Raman spectroscopy (black). © Trustees of the British Museum.

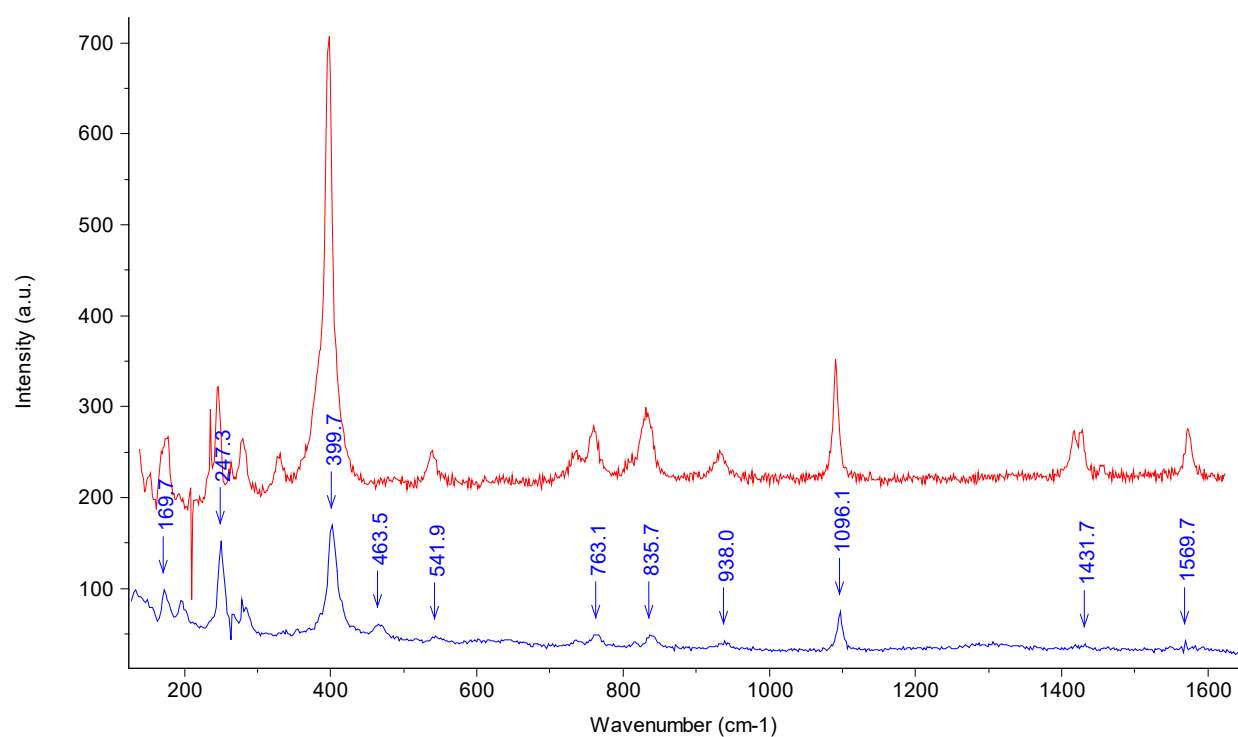

Figure S4. Raman spectrum (red) of a sample of blue pigment (S3) taken from the location indicated in Figure S3 and a reference spectrum of azurite (blue). © Trustees of the British Museum.

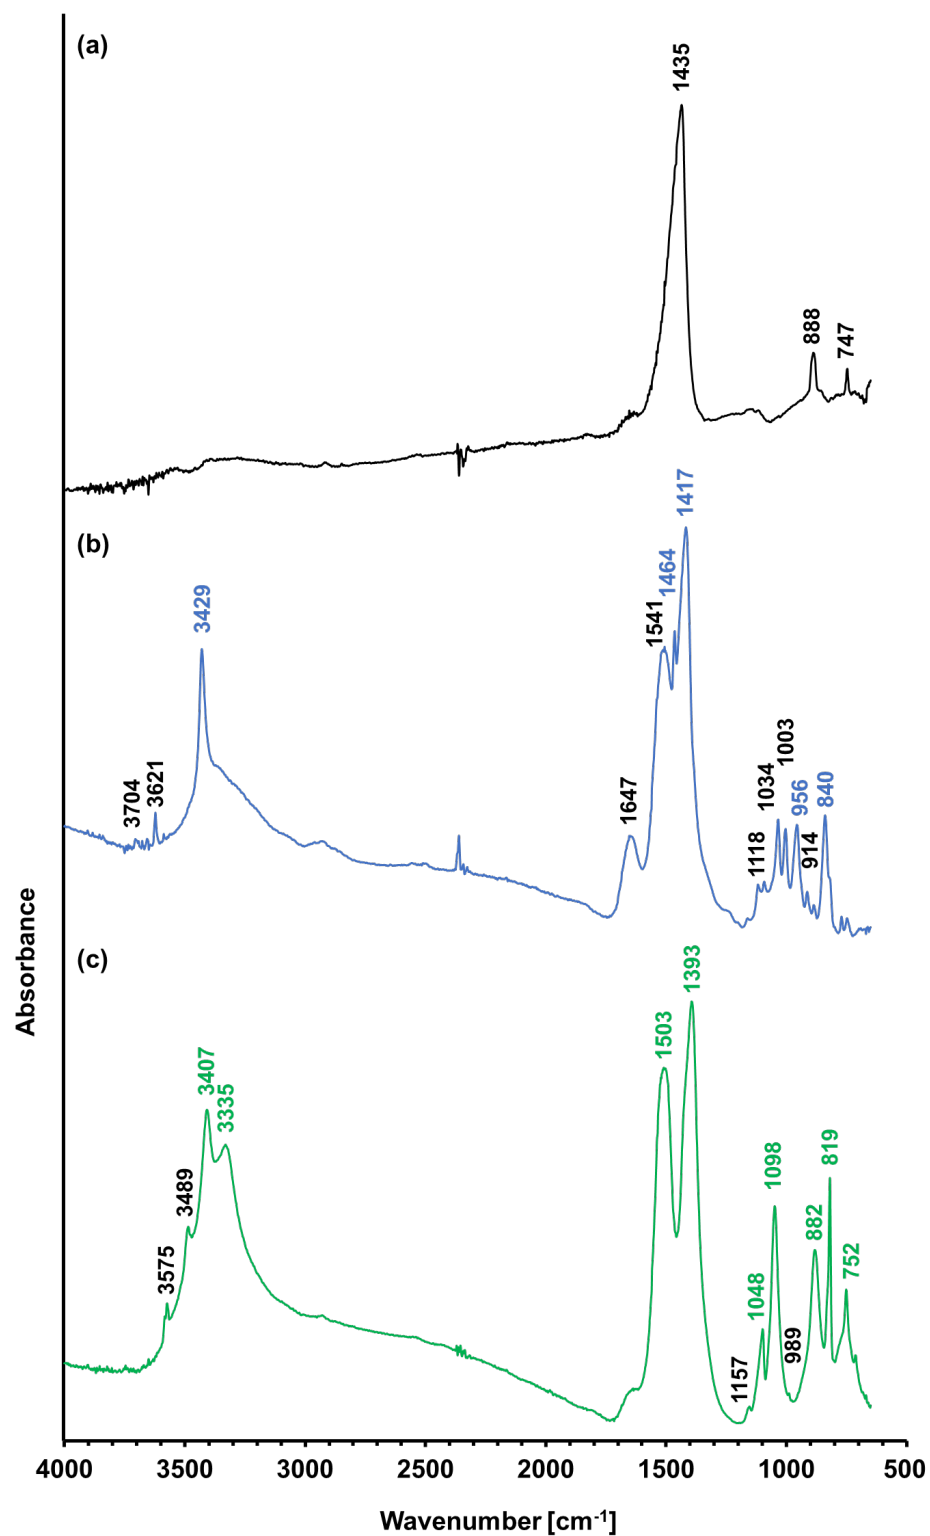

Figure S5. FTIR spectra of samples of: (a) white pigment (S2); (b) blue pigment (S3) and (c) green pigment (S4) taken from the locations indicated in Figure S3. © Trustees of the British Museum.
